# Supplementary material for: Printed dry electrode for neuromuscular electrical stimulation (NMES) for e-textile
Source: Royal Society of Chemistry journal article supplement (doi:10.1039/d2nr06008f), 2023-01-01
Supplement: d2nr06008f1.pdf [file d2nr06008f1.pdf]

Supplementary Information

## Printed Dry Electrode for Neuromuscular Electrical Stimulation (NMES) for E-Textile

Youssif Merhi<sup>1</sup>, Pablo F. Betancur<sup>2</sup>, Teresa S. Ripolles<sup>2</sup>, Charlotte Suetta<sup>3</sup>, Morten R Brage-Andersen<sup>3</sup>, Sofie K Hansen<sup>3</sup>, Anders Frydenlund<sup>3</sup>, Jens Vinge Nygaard<sup>4</sup>, Peter H Mikkelsen<sup>1</sup>, **Pablo P Boix**<sup>2</sup>, Shweta Agarwala<sup>1\*</sup>

### AFM Surface Roughness

Table S1: Measurements of surface roughness on different samples of the dry electrode on the printed e-textile.

| <b>Sample 1</b> | <b>Electrode 1</b> | <b>Rq</b> | <b>Interface 1</b> | <b>Rq</b> |
|-----------------|--------------------|-----------|--------------------|-----------|
|                 | 1                  | 0,476     | 1                  | 0,231     |
|                 | 2                  | 0,23      | 2                  | 0,19      |
|                 | 3                  | 0,277     | 3                  | 0,196     |
|                 | 4                  | 0,177     | 4                  | 0,218     |
|                 | 5                  | 0,215     | 5                  | 0,271     |
|                 |                    |           |                    |           |
| <b>Sample 2</b> | <b>Electrode 2</b> | <b>Rq</b> | <b>Interface 2</b> | <b>Rq</b> |
|                 | 1                  | 0,306     | 1                  | 0,203     |
|                 | 2                  | 0,323     | 2                  | 0,276     |
|                 | 3                  | 0,356     | 3                  | 0,274     |
|                 | 4                  | 0,238     | 4                  | 0,213     |
|                 | 5                  | 0,321     | 5                  | 0,231     |
|                 |                    |           |                    |           |
| <b>Sample 3</b> | <b>Electrode 3</b> | <b>Rq</b> | <b>Interface 3</b> | <b>Rq</b> |
|                 | 1                  | 0,295     | 1                  | 0,213     |
|                 | 2                  | 0,301     | 2                  | 0,198     |
|                 | 3                  | 0,361     | 3                  | 0,231     |
|                 | 4                  | 0,345     | 4                  | 0,162     |
|                 | 5                  | 0,187     | 5                  | 0,187     |
|                 |                    |           |                    |           |
| <b>Sample 4</b> | <b>Electrode 4</b> | <b>Rq</b> | <b>Interface 4</b> | <b>Rq</b> |
|                 | 1                  | 0,356     | 1                  | 0,187     |
|                 | 2                  | 0,398     | 2                  | 0,201     |
|                 | 3                  | 0,361     | 3                  | 0,197     |
|                 | 4                  | 0,291     | 4                  | 0,156     |
|                 | 5                  | 0,305     | 5                  | 0,231     |
|                 |                    |           |                    |           |
| <b>Sample 5</b> | <b>Electrode 5</b> | <b>Rq</b> | <b>Interface 5</b> | <b>Rq</b> |
|                 | 1                  | 0,299     | 1                  | 0,232     |
|                 | 2                  | 0,312     | 2                  | 0,237     |
|                 | 3                  | 0,371     | 3                  | 0,325     |

|  |   |       |   |       |
|--|---|-------|---|-------|
|  | 4 | 0,358 | 4 | 0,189 |
|  | 5 | 0,311 | 5 | 0,199 |

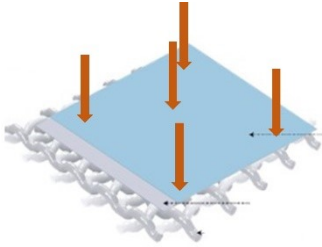

Figure S1: Schematic depicting the 5 different points chosen on the printed dry electrode for AFM measurements.

# Electrochemical Impedance Spectroscopy (EIS)

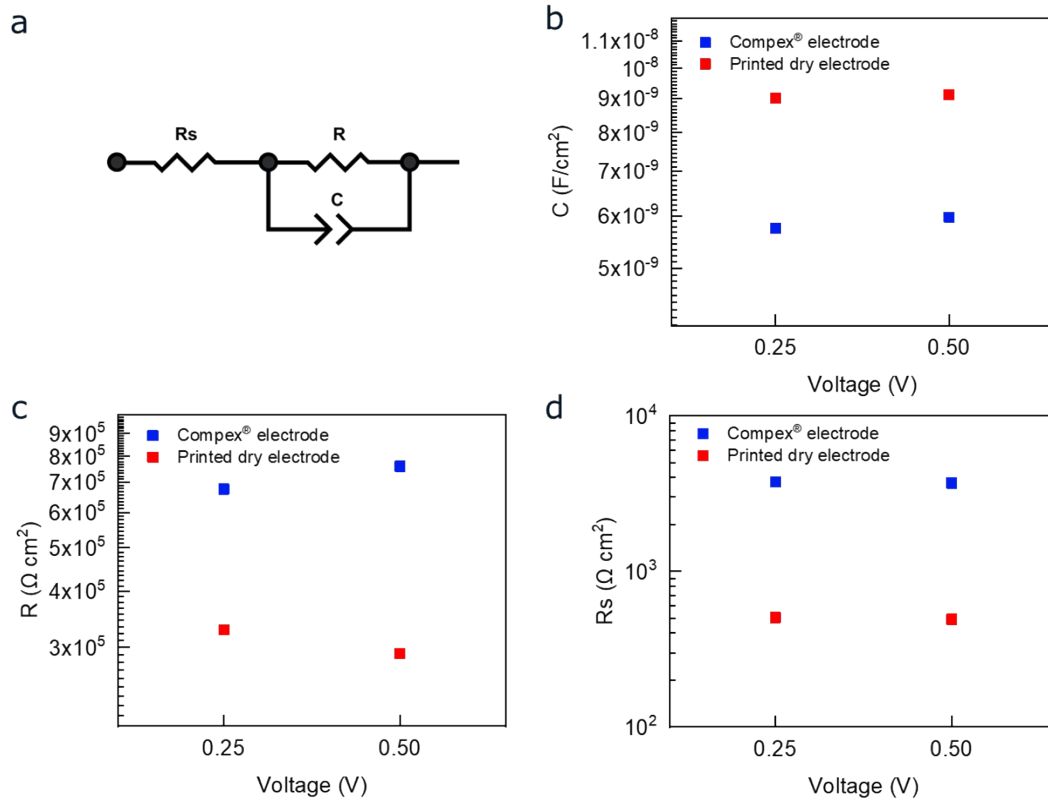

Figure S2: a) The equivalent circuit model used to fit the EIS. Fitted parameters for b) interfacial capacitance,  $C$ ; c) interfacial resistance,  $R$  and d) series resistance,  $R_s$ .
